# Supplementary material for: Efficacy, Immunogenicity, and Safety of the Two-Dose Schedules of TURKOVAC versus CoronaVac in Healthy Subjects: A Randomized, Observer-Blinded, Non-Inferiority Phase III Trial
Source: MDPI journal article supplement (doi:10.3390/vaccines10111865), 2022-11-04
Supplement: s1 [file s1]

**Supplementary Material S4. List of participating sites**

| <b>Centers</b>                                                                                                                                   | <b>Number of<br/>volunteers<br/>recruited</b> |
|--------------------------------------------------------------------------------------------------------------------------------------------------|-----------------------------------------------|
| Hacettepe University Faculty of Medicine Adult Hospital, Department of Internal Medicine, Division of General Internal Medicine, Ankara, Türkiye | 208                                           |
| Ankara City Hospital Infectious Diseases and Clinical Microbiology Clinic, Ankara, Türkiye                                                       | 304                                           |
| University of Health Sciences, Izmir Tepecik Training and Research Hospital, Infectious Diseases Clinic, Izmir, Türkiye                          | 22                                            |
| Erciyes University Faculty of Medicine, Department of Infectious Diseases and Clinical Microbiology, Kayseri, Türkiye                            | 164                                           |
| Kocaeli University Faculty of Medicine, Department of Infectious Diseases and Clinical Microbiology, Kocaeli, Türkiye                            | 14                                            |
| Başakşehir Çam and Sakura City Hospital, Infectious Diseases and Clinical Microbiology Clinic, Istanbul, Türkiye                                 | 456                                           |
| Kayseri City Training and Research Hospital, Department of Infectious Diseases and Clinical Microbiology, Kayseri, Türkiye                       | 112                                           |

|                                                                                                                                       |             |
|---------------------------------------------------------------------------------------------------------------------------------------|-------------|
| Uludağ University Health Application and Research Center, Department of Infectious Diseases and Clinical Microbiology, Bursa, Türkiye | 10          |
| <b>Total</b>                                                                                                                          | <b>1290</b> |
