# Supplementary material for: Efficacy, Immunogenicity, and Safety of the Two-Dose Schedules of TURKOVAC versus CoronaVac in Healthy Subjects: A Randomized, Observer-Blinded, Non-Inferiority Phase III Trial
Source: MDPI journal article supplement (doi:10.3390/vaccines10111865), 2022-11-04
Supplement: s1 [file s1]

# Supplementary Material S6. Adverse events

**Table S6.** Distribution of adverse events

|                 | CoronaVac arm (n=459) |            | TURKOVAC arm (n=456) |            | Total (n=915) |            |        |
|-----------------|-----------------------|------------|----------------------|------------|---------------|------------|--------|
|                 | N=459                 |            | N=456                |            | N=915         |            |        |
|                 | Events                | Subjects   | Events               | Subjects   | Events        | Subjects   |        |
|                 | n                     | n (%)      | n                    | n (%)      | n             | n (%)      | p      |
| Total AEs       | 754                   | 228 (49.7) | 896                  | 268 (58.8) | 1650          | 496 (54.2) | 0.006  |
| Solicited AEs   | 700                   | 225 (49)   | 840                  | 267 (58.6) | 1540          | 492 (53.8) | 0.004  |
| Unsolicited AEs | 54                    | 45 (9.8)   | 56                   | 45 (9.9)   | 110           | 90 (9.8)   | 0.974  |
| Systemic AEs    | 636                   | 186 (40.5) | 625                  | 178 (39)   | 1261          | 364 (39.8) | 0.646  |
| Local AEs       | 118                   | 98 (21.4)  | 271                  | 199 (43.6) | 389           | 297 (32.5) | <0.001 |
| Grade 1 AEs     | 632                   | 207 (45.1) | 806                  | 256 (56.1) | 1438          | 463 (50.6) | 0.001  |
| Grade 2 AEs     | 121                   | 52 (11.3)  | 90                   | 37 (8.1)   | 211           | 89 (9.7)   | 0.101  |
| Grade 3 AEs     | 1                     | 1 (0.2)    | 0                    | 0 (0)      | 1             | 1 (0.1)    | 1      |
| Grade 4 AEs     | -                     | -          | -                    | -          | -             | -          | -      |

AEs, Adverse events.

**Table S7.** Distribution of serious adverse events

| <b>Vaccination arm</b> | <b>Definition of Serious Adverse Events</b> | <b>Date of Hospitalization</b> | <b>Follow-up</b> | <b>Date of Start</b> | <b>Date of 1<sup>st</sup> dose vaccination</b> | <b>Date of 2<sup>nd</sup> dose vaccination</b> |
|------------------------|---------------------------------------------|--------------------------------|------------------|----------------------|------------------------------------------------|------------------------------------------------|
| CoronaVac              | Hospitalization for kidney stones           | 04/08/2021                     | Yes              | 04/08/2021           | 05/07/2021                                     | 06/08/2021                                     |
| TURKOVAC               | Hospitalization for febrile COVID-19        | 12/08/2021                     | Yes              | 12/08/2021           | 08/07/2021                                     | 05/08/2021                                     |
| TURKOVAC               | Hospitalization for COVID-19                | 19/09/2021                     | Yes              | 19/09/2021           | 08/09/2021                                     | 18/01/2022                                     |
| TURKOVAC               | Hospitalization for febrile COVID-19        | 02/10/2021                     | Yes              | 02/10/2021           | 26/08/2021                                     | 23/09/2021                                     |
| CoronaVac              | Hospitalization for COVID-19                | 19/12/2021                     | Yes              | 19/12/2021           | 06/09/2021                                     | 04/10/2021                                     |
| CoronaVac              | Diabetes Mellitus                           | 24/01/2022                     | Yes              | 24/01/2022           | 23/11/2021                                     | 30/12/2021                                     |
| CoronaVac              | Nasal Septal Deviation                      | 19/02/2022                     | No               | 19/02/2022           | 8/11/2021                                      | 06/12/2021                                     |
