# Supplementary material for: Efficacy, Immunogenicity, and Safety of the Two-Dose Schedules of TURKOVAC versus CoronaVac in Healthy Subjects: A Randomized, Observer-Blinded, Non-Inferiority Phase III Trial
Source: MDPI journal article supplement (doi:10.3390/vaccines10111865), 2022-11-04
Supplement: s1 [file s1]

**Supplementary Material S5. Distribution of COVID-19 cases with regard to the WHO Clinical Progression Scale**

**Table S5.** COVID-19 severity and symptoms of the cases in the efficacy analysis with regard to WHO Clinical Progression Scale (the highest score during the course of the disease is given here)

| Patient state                  | Descriptor                                                                                                        | CoronaVac    | TURKOVAC     | Total     |
|--------------------------------|-------------------------------------------------------------------------------------------------------------------|--------------|--------------|-----------|
|                                |                                                                                                                   | arm<br>n (%) | arm<br>n (%) | n (%)     |
| Ambulatory mild disease        | 2 Symptomatic- independent                                                                                        | 60 (13.1)    | 35 (7.7)     | 95 (10.4) |
|                                | 3 Symptomatic- assistance needed                                                                                  | 0 (0)        | 0 (0)        | 0 (0)     |
|                                | 4 Hospitalized (If hospitalization is for isolation only record the status with an outpatient)- no oxygen therapy | 0 (0)        | 0 (0)        | 0 (0)     |
| Hospitalized: moderate disease | 5 Hospitalized; oxygen by mask or nasal prongs                                                                    | 1 (0.2)      | 0 (0)        | 1 (0.1)   |
| Hospitalized: severe diseases  | 6 Hospitalized-oxygen by non-invasive or high flow ventilation                                                    | 0 (0)        | 0 (0)        | 0 (0)     |

|       |           |          |           |
|-------|-----------|----------|-----------|
| Total | 61 (13.3) | 35 (7.7) | 96 (10.5) |
|-------|-----------|----------|-----------|
