# Supplementary material for: Efficacy, Immunogenicity, and Safety of the Two-Dose Schedules of TURKOVAC versus CoronaVac in Healthy Subjects: A Randomized, Observer-Blinded, Non-Inferiority Phase III Trial
Source: MDPI journal article supplement (doi:10.3390/vaccines10111865), 2022-11-04
Supplement: s1 [file s1]

#### **Supplementary Material S7. TURKOVAC Study Group**

**Dr. Alper Gunduz, Dr. Onur Ozalp, and Dr. Soner Sabirli** from Department of Infectious Diseases and Clinical Microbiology, University of Health Sciences, Başakşehir Cam and Sakura City Hospital, 34480 Istanbul, Türkiye

**Assoc. Prof. Bircan Kayaaslan, Assoc. Prof. Imran Hasanoglu, and Assist. Prof Ayşe Kaya Kalem** from Infectious Diseases and Clinical Microbiology Clinic, Ankara Yildirim Beyazıt University, Ankara City Hospital, 06800 Ankara, Türkiye

**Dr. Muge Ayhan, Dr. Belgin Coskun, Dr. Omer Aydos, and Dr. Gamze Kaya** from Infectious Diseases and Clinical Microbiology Clinic, Ankara City Hospital, 06800 Ankara, Türkiye

**Assoc. Prof. Dr. Ahmet Cagkan Inkaya and Dr. Ahmet Gorkem Er** from Department of Infectious Diseases and Clinical Microbiology, Hacettepe University Faculty of Medicine, 06230 Ankara, Türkiye

**Assist. Prof. Zeynep Ture Yuce and Assist Prof. Gamze Kalin Unuvar** from Department of Infectious Diseases and Clinical Microbiology, Erciyes University Faculty of Medicine, 38030 Kayseri, Türkiye

**Dr. Aysin Kiliç Toker** from Department of Infectious Diseases and Clinical Microbiology, Kayseri City Training and Research Hospital, 38080 Kayseri, Türkiye

**Dr. Omer Demir** from Infectious Diseases Clinic, University of Health Sciences, Izmir Tepecik Training and Research Hospital, 35020 Izmir, Türkiye

**Dr. Sonay Arslan and Dr. Zeynep Bayraktar** from Department of Infectious Diseases and Clinical Microbiology, Kocaeli University Faculty of Medicine, 41001 Kocaeli, Türkiye

**Dr. Ugur Onal** from Department of Infectious Diseases and Clinical Microbiology, Bursa Uludag  
University Faculty of Medicine, 16059 Bursa, Türkiye
