# Supplementary material for: Efficacy, Immunogenicity, and Safety of the Two-Dose Schedules of TURKOVAC versus CoronaVac in Healthy Subjects: A Randomized, Observer-Blinded, Non-Inferiority Phase III Trial
Source: MDPI journal article supplement (doi:10.3390/vaccines10111865), 2022-11-04
Supplement: s1 [file s1]

## **Supplementary Material S3. Safety monitoring**

### **3.1. Monitoring**

Academicians from different institutions were selected for the independent Data and Safety Monitoring Board. In this context, specialists experienced in infectious diseases and clinical microbiology, public health-epidemiology, social pediatrics, cardiology and internal medicine and vaccination/adverse effects were included in the group. Data and Safety Monitoring Board monitored the quality of evidence, adverse event following, revisions in line with the current literature, individual privacy, and data reliability from the planning stage to the end of the study and oversaw if the practices were carried out in accordance with Good Clinical Practice and Human Rights Declaration conditions. In addition to DSMB, Health Institutes of Türkiye as the sponsor of the study, was responsible for ensuring the proper conduct of the study, in accordance with the Declaration of Helsinki (Amended Fortaleza, Brazil, 2013) and Good Clinical Practices (GCP) including, but not limited to, protocol adherence and the validity of the data recorded in the database.

### **3.2. Reporting Procedures for SAEs**

Any SAE was reported to Data and Safety Monitoring Board (DSMB), Ethics Committee, Ministry of Health, sponsor and clinical study monitor within 24 hours of the investigator's first knowledge of the event, regardless of the presumed relationship to the investigational product. Chest pain and/or dyspnea was managed according to the flow chart prepared within the scope of the study. All AEs were assessed by study investigators for severity and causality. Any AE assessed by study investigators as possibly, probably, or definitely related to study product was defined as adverse reaction.

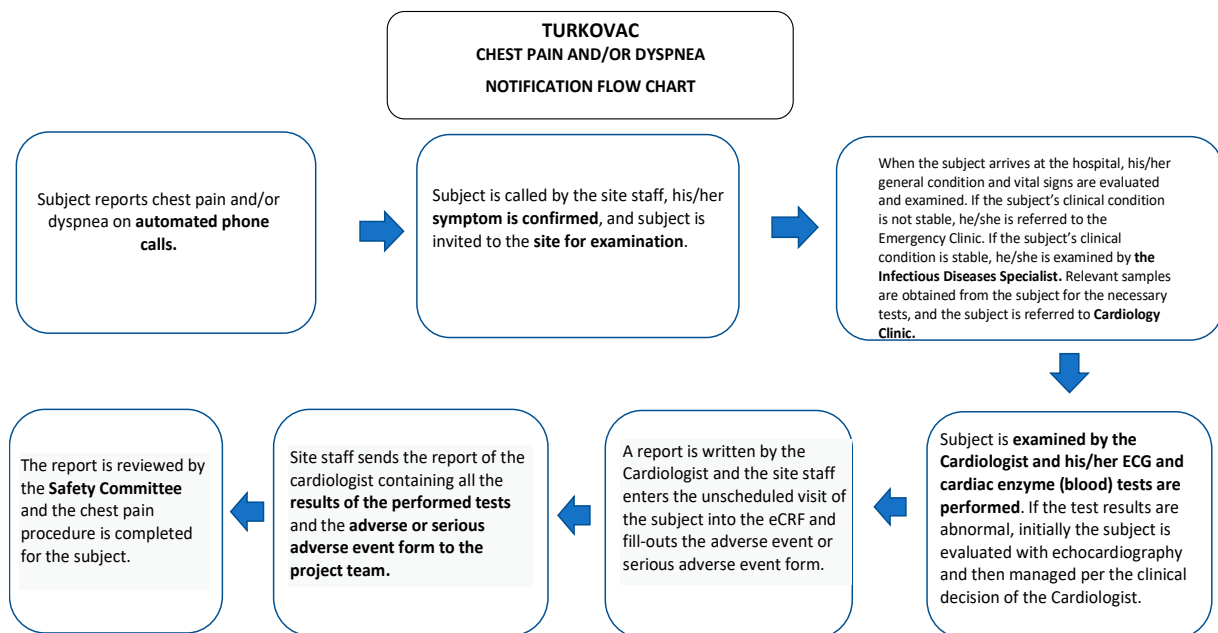

**Fig. S1. Management algorithm of chest pain and/or dyspnea**

### 3.3. Assessment of severity of adverse events

The severity of clinical adverse events was assessed according to scales based on Food and Drug Administration (FDA) toxicity grading scales for vaccine clinical trials, as shown in the tables below.

**Table S2. Severity grading criteria for local adverse events**

|      | Grade 1                                               | Grade 2                     | Grade 3              | Grade 4                          |
|------|-------------------------------------------------------|-----------------------------|----------------------|----------------------------------|
| Pain | Not affecting or slightly affecting physical activity | Affecting physical activity | Affecting daily life | Loss of basic self-care ability, |

---

|             |                             |                            |                                    |                 |
|-------------|-----------------------------|----------------------------|------------------------------------|-----------------|
|             |                             |                            | or                                 |                 |
|             |                             |                            | hospitalization                    |                 |
|             | Diameter 2.5 to             | 5 to <10 cm in             | Diameter ≥10 cm or area            |                 |
|             | <5 cm or area               | diameter or 25             | ≥100 cm <sup>2</sup> or ulceration | Abscess,        |
|             | 6.25 to <25 cm <sup>2</sup> | to <100 cm <sup>2</sup> in | or secondary infection or          | exfoliative     |
| Induration* | without affecting           | area or                    | phlebitis or aseptic               | dermatitis,     |
|             | or slightly                 | affecting daily            | abscess or wound                   | dermal or deep  |
|             | affecting daily             | life                       | drainage or seriously              | tissue necrosis |
|             | life                        |                            | affecting daily life               |                 |
|             | Diameter 2.5 to             | 5 to <10 cm in             | Diameter ≥10 cm or area            |                 |
|             | <5 cm or area               | diameter or 25             | ≥100 cm <sup>2</sup> or ulceration | Abscess,        |
|             | 6.25 to <25 cm <sup>2</sup> | to <100 cm <sup>2</sup> in | or secondary infection or          | exfoliative     |
| Swelling*   | without affecting           | area or                    | phlebitis or aseptic               | dermatitis,     |
|             | or slightly                 | affecting daily            | abscess or wound                   | dermal or deep  |
|             | affecting daily             | life                       | drainage or seriously              | tissue necrosis |
|             | life                        |                            | affecting daily life               |                 |
|             | Diameter 2.5 to             | 5 to <10 cm in             | Diameter ≥10 cm or area            |                 |
|             | <5 cm or area               | diameter or 25             | ≥100 cm <sup>2</sup> or ulceration | Abscess,        |
|             | 6.25 to <25 cm <sup>2</sup> | to <100 cm <sup>2</sup> in | or secondary infection or          | exfoliative     |
| Redness*    | without affecting           | area or                    | phlebitis or aseptic               | dermatitis,     |

---

|          |                             |                            |                                          |                 |
|----------|-----------------------------|----------------------------|------------------------------------------|-----------------|
|          | or slightly                 | affecting daily            | abscess or wound                         | dermal or deep  |
|          | affecting daily             | life                       | drainage or seriously                    | tissue necrosis |
|          | life                        |                            | affecting daily life                     |                 |
|          | Diameter 2.5 to             |                            | Diameter $\geq 10$ cm or area            |                 |
|          | <5 cm or area               | 5 to <10 cm in             | $\geq 100$ cm <sup>2</sup> or ulceration | Abscess,        |
|          | 6.25 to <25 cm <sup>2</sup> | diameter or 25             | or secondary infection or                | exfoliative     |
| Rash*    | without affecting           | to <100 cm <sup>2</sup> in | phlebitis or aseptic                     | dermatitis,     |
|          | or slightly                 | area or                    | abscess or wound                         | dermal or deep  |
|          | affecting daily             | affecting daily            | drainage or seriously                    | tissue necrosis |
|          | life                        | life                       | affecting daily life                     |                 |
|          |                             | Itching at                 |                                          |                 |
|          |                             | injection site,            |                                          |                 |
|          | Itching at                  | did not                    |                                          |                 |
| Pruritus | injection site,             | alleviate                  | Affecting daily life                     | ..              |
|          | relieved within             | within 48 h                |                                          |                 |
|          | 48 hours                    | after                      |                                          |                 |
|          |                             | treatment                  |                                          |                 |

---

\* The maximum measured diameter or area should be used for induration and swelling, rash and redness; evaluation and grading should be based on functional grade and actual measurement results, and higher grading indicators should be selected.

**Table S3.** Severity grading criteria for systemic adverse events and vital signs

|                    | Grade 1                                                                                     | Grade 2                                                                    | Grade 3                                                                                                                                    | Grade 4                                                                |
|--------------------|---------------------------------------------------------------------------------------------|----------------------------------------------------------------------------|--------------------------------------------------------------------------------------------------------------------------------------------|------------------------------------------------------------------------|
| Diarrhea           | Mild or transient, 3-4 times/day, abnormal stool, or mild diarrhea lasting less than 1 week | Moderate or persistent, 5-7 times/day, abnormal stool, or diarrhea >1 week | >7 times/day, abnormal stool, or hemorrhagic diarrhea, orthostatic hypotension, electrolyte imbalance, requiring intravenous infusion >2 L | Hypotensive shock, hospitalization                                     |
| Decreased appetite | Decreased appetite, not affecting food intake                                               | Decreased appetite, reduced food intake, not affecting body weight         | Decreased appetite, and significantly reduced body weight                                                                                  | Need intervention (such as gastric tube feeding, parenteral nutrition) |
| Vomiting           | 1-2 times/24 hours without                                                                  | 3-5 times/24 hours or affecting activity                                   | >6 times within 24 hours or requiring                                                                                                      | Hospitalization or other nutrition                                     |

|                                   |                                                                        |                                                                                                                 |                                                                                             |                                            |
|-----------------------------------|------------------------------------------------------------------------|-----------------------------------------------------------------------------------------------------------------|---------------------------------------------------------------------------------------------|--------------------------------------------|
|                                   | affecting activity                                                     |                                                                                                                 | intravenous fluid infusion                                                                  | routes due to hypotensive shock            |
| Nausea                            | Transient (<24 hours) or intermittent and basically normal food intake | Persistent nausea leads to reduced food intake (24-48 hours)                                                    | Persistent nausea leads to almost no food intake (>48 hours) or requires intravenous fluids | Life threatening (e.g., hypotensive shock) |
| Muscle pain (non-inoculated site) | Does not affect daily activities                                       | Slightly affects daily activities                                                                               | Severe muscle pain, seriously affects daily activities                                      | Emergency or hospitalization               |
| Joint pain                        | Mild pain, not affecting daily activities                              | Moderate pain, requiring analgesics and/or pain interferes with functioning, yet not affecting daily activities | Severe pain, seriously affecting daily activities                                           | Emergency or hospitalization               |

---

|          |                                                                       |                                                                                     |                                                                                                             |                                                              |
|----------|-----------------------------------------------------------------------|-------------------------------------------------------------------------------------|-------------------------------------------------------------------------------------------------------------|--------------------------------------------------------------|
| Headache | Not affecting daily activities, no treatment required                 | Transient, slightly affecting daily activities, may need treatment or intervention  | Seriously affecting daily activities, need treatment or intervention                                        | Intractability, need emergency or hospitalization            |
| Cough    | Transient, no treatment required                                      | Persistent cough, effective treatment                                               | Paroxysmal cough, uncontrolled treatment                                                                    | Emergency or hospitalization                                 |
| Fatigue  | Normal activity is weakened <48 hours, without affecting the activity | Normal activity is weakened by 20%~50% >48 hours, slightly affecting the activity   | Normal activity is weakened by >50%, seriously affecting daily activities, unable to work                   | Unable to take care of oneself, emergency or hospitalization |
| Pruritus | Mild or localized; topical intervention indicated                     | Widespread and intermittent; skin changes from scratching (e.g., edema, papulation, | Widespread and constant; limiting self-care activities of daily living or sleep; systemic corticosteroid or | -                                                            |

|                                       |                                           |                                                                                                                                                   |                                                                                                                  |                                                                              |
|---------------------------------------|-------------------------------------------|---------------------------------------------------------------------------------------------------------------------------------------------------|------------------------------------------------------------------------------------------------------------------|------------------------------------------------------------------------------|
|                                       |                                           | excoriations,<br>lichenification,<br>oozing/crusts);<br>oral intervention<br>indicated; limiting<br>instrumental<br>activities of daily<br>living | immunosuppressive<br>therapy indicated                                                                           |                                                                              |
| Skin rash<br>(exanthema) <sup>†</sup> | Present, but<br>asymptomatic              | Symptomatic<br>(pruritus/pain),<br>but interferes<br>only slightly with<br>daily activities                                                       | Symptomatic,<br>prevents daily<br>activities                                                                     | Emergency or<br>hospitalization                                              |
| Allergic<br>reaction                  | Systemic<br>intervention<br>not indicated | Oral intervention<br>indicated                                                                                                                    | Bronchospasm;<br>hospitalization<br>indicated for clinical<br>sequelae; intravenous<br>intervention<br>indicated | Life-<br>threatening<br>consequences;<br>urgent<br>intervention<br>indicated |
| Vital signs                           | -                                         | -                                                                                                                                                 | -                                                                                                                | -                                                                            |



|                          |                 |                 |          |                                    |
|--------------------------|-----------------|-----------------|----------|------------------------------------|
| Fever (oral temperature) | 37.5 ~ < 38.2°C | 38.2 ~ < 38.7°C | ≥ 38.7°C | ≥ 39.7°C, lasting more than 3 days |
|                          |                 |                 |          |                                    |

<sup>†</sup> Specify if the skin rash is located in any specific body part or if it is widespread.

The severity of the unsolicited clinical adverse events was classified through a numeric scale of one to five, which was created based on the grading depicted in Table S4.

**Table S4.** Severity grading criteria for unsolicited adverse events

|                            |                                                                                                                                                              |
|----------------------------|--------------------------------------------------------------------------------------------------------------------------------------------------------------|
| Grade 1 (Mild)             | Transient (<48 hours) or mild discomfort; no medical intervention/therapy required                                                                           |
| Grade 2 (Moderate)         | Mild to moderate limitation in activity - some assistance may be needed; no or minimal medical intervention/therapy required                                 |
| Grade 3 (Severe)           | Marked limitation in activity, some assistance usually required; medical intervention/therapy required, hospitalizations possible                            |
| Grade 4 (Life-threatening) | Extreme limitation in activity, significant assistance required; significant medical intervention/therapy required, hospitalization or hospice care probable |
| Grade 5                    | Death                                                                                                                                                        |
